# Supplementary material
Source: Springer Nature journal article supplement (https://www.springermedizin.de/resource/supplementary/12948_2010_78_MOESM2_ESM.pdf/9557182)

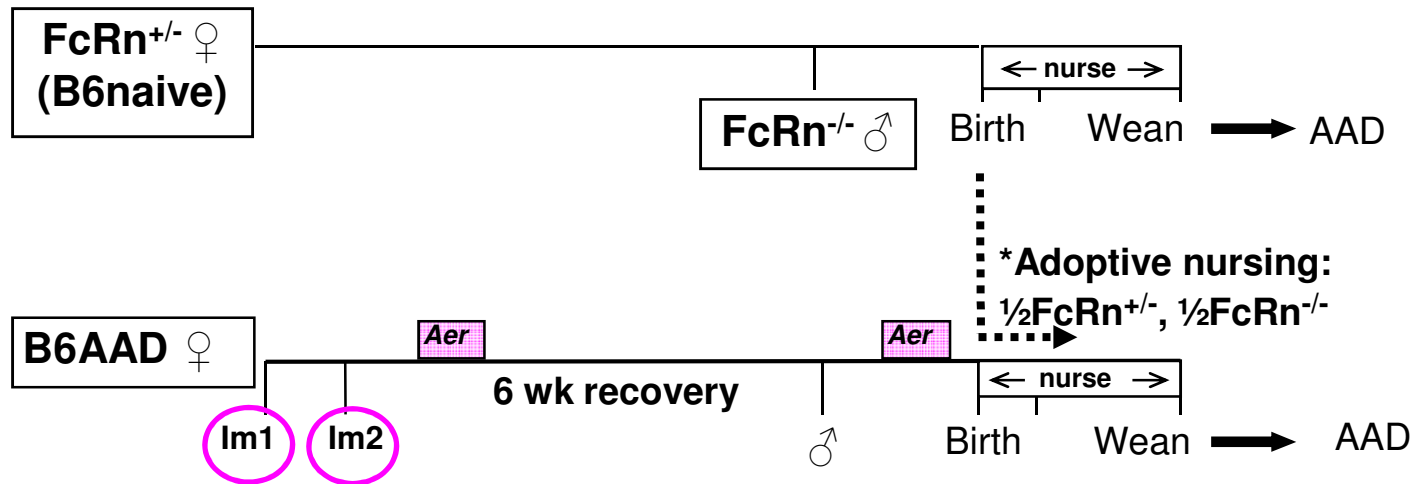

Supplement: MOESM2 [file 9557182]
